# Supplementary material for: Intravenous Thrombolysis with Recombinant Tissue Plasminogen Activator for Ischemic Stroke Patients over 80 Years Old: The Fukuoka Stroke Registry
Source: PubMed Central journal article supplement (PMC4199731; doi:10.1371/journal.pone.0110444), 2014-10-16
Supplement: pone.0110444.s001.pdf [file pone.0110444.s001.pdf]

**Figure S1. Distribution of standardized differences before and after 1:1 matching**

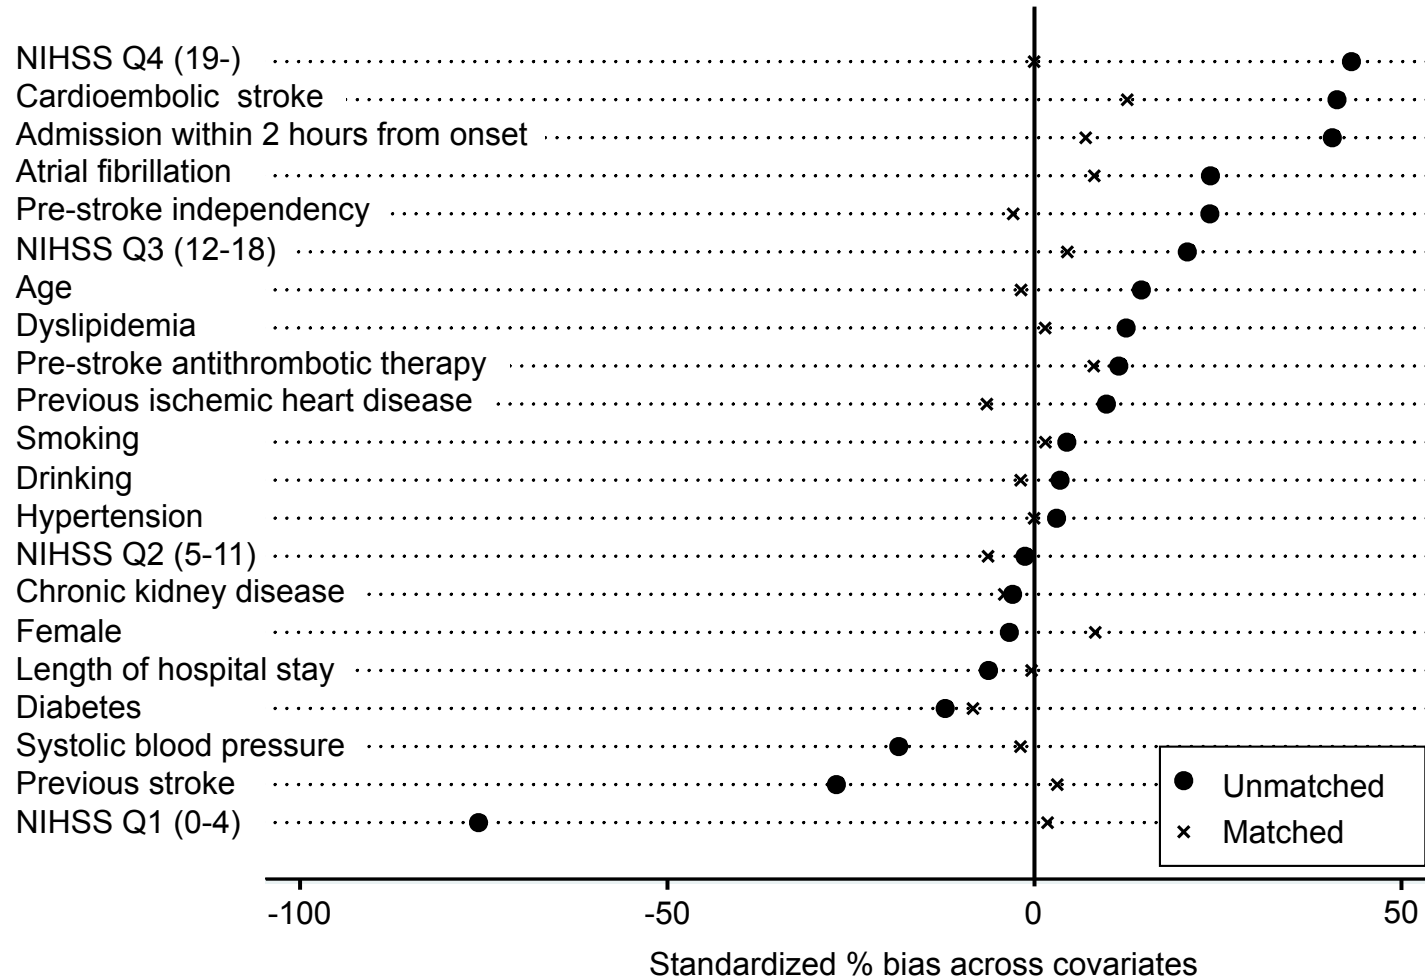

The distribution of standardized differences is shown across covariates before (circles) and after matching (crosses).
